# Supplementary material
Source: PubMed Central journal article supplement (PMC8602941)
Supplement: develop-148-199861-s1.pdf [file develop-148-199861-s1.pdf]

**Table S1.**

[Click here to download Table S1](#)

**Table S2.**

[Click here to download Table S2](#)
